# Supplementary material for: Antitumor Effect of Guatteria olivacea R. E. Fr. (Annonaceae) Leaf Essential Oil in Liver Cancer
Source: MDPI journal article supplement (doi:10.3390/molecules27144407), 2022-07-09
Supplement: s1 [file s1]

## Supplementary Material

### **Antitumor effect of *Guatteria olivacea* R. E. Fr. (Annonaceae) leaf essential oil in liver cancer**

Alexandre F. C. Galvão<sup>1</sup>, Morgana de S. Araújo<sup>2</sup>, Valdenizia R. Silva<sup>1</sup>, Luciano de S. Santos<sup>1</sup>, Rosane B. Dias<sup>1,3</sup>, Clarissa A. G. Rocha<sup>1,3</sup>, Milena B. P. Soares<sup>1,4</sup>, Felipe M. A. da Silva<sup>2</sup>, Hector H. F. Koolen<sup>5</sup>, Gokhan Zengin<sup>6</sup>, Emmanoel V. Costa<sup>2,\*</sup>, Daniel P. Bezerra<sup>1,\*</sup>

<sup>1</sup>Gonçalo Moniz Institute, Oswaldo Cruz Foundation (IGM-FIOCRUZ/BA), Salvador, BA, 40296-710, Brazil.

<sup>2</sup>Department of Chemistry, Federal University of Amazonas (UFAM), Manaus, AM, 69080-900, Brazil.

<sup>3</sup>Department of Propedeutics, School of Dentistry of the Federal University of Bahia, Salvador 40110-909, BA, Brazil.

<sup>4</sup>SENAI Institute for Innovation in Advanced Health Systems, SENAI CIMATEC, Salvador, BA, 41650-010, Brazil.

<sup>5</sup>Metabolomics and Mass Spectrometry Research Group, Superior School of Health Sciences, Amazonas State University (UEA), Manaus, AM, 690065-130, Brazil.

<sup>6</sup>Department of Biology, Science Faculty, Selcuk University, 42130, Konya, Turkey.

\*Corresponding authors:

E. V. Costa (e-mail: emmanoelvc@gmail.com); D. P. Bezerra (e-mail: daniel.bezerra@fiocruz.br); Tel./Fax: +55-92-3305-1181 Ramal 2870 (E.V. Costa); Tel./Fax: +55-71-3176-2272 (D. P. Bezerra).

**A**

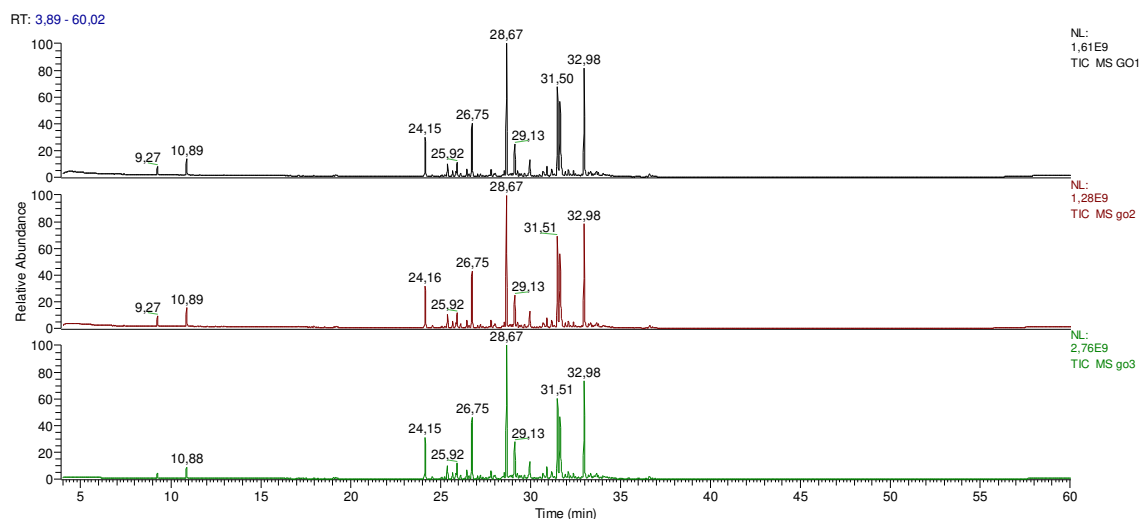

**B**

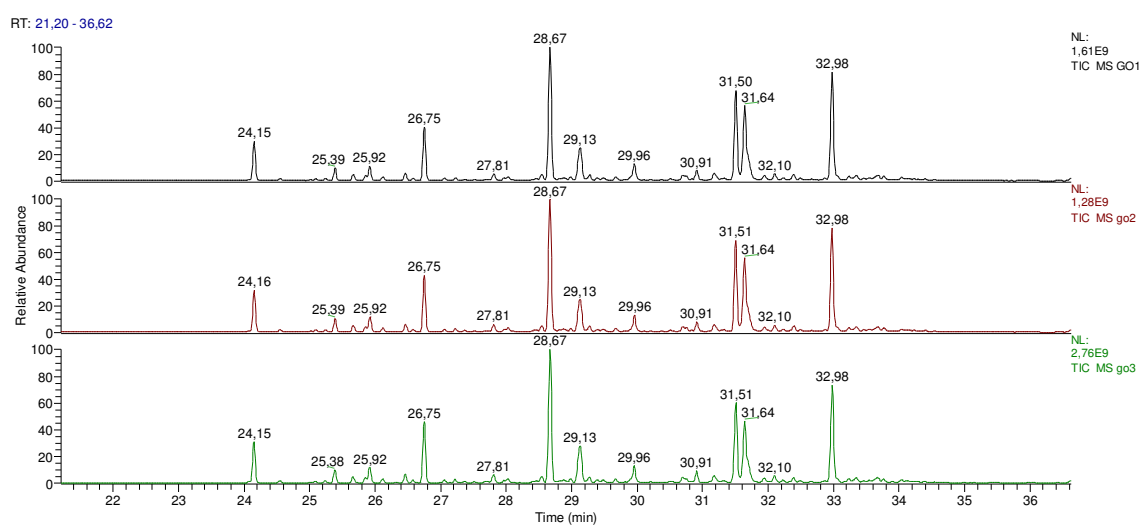

**Figure S1. (A)** Chromatogram of the total ions of *G. olivacea* leaf EO (triplicate);  
**(B)** Enlargement of the region between 22.0 min to 36.0 min.

Retention time of some main constituents present in the OE:

|                                                    |                                                    |                                                          |                                                  |
|----------------------------------------------------|----------------------------------------------------|----------------------------------------------------------|--------------------------------------------------|
| <b><math>\alpha</math>-Pinene</b><br>(9.27 min)    | <b><math>\beta</math>-Pinene</b><br>(10.89 min)    | <b><math>\delta</math>-Elemene</b><br>(24.15; 24.16 min) | <b><math>\beta</math>-Elemene</b><br>(25.92 min) |
| <b>(E)-Caryophyllene</b><br>(26.75 min)            | <b><math>\alpha</math>-Humulene</b><br>(27.81 min) | <b>Germacrene D</b><br>(28.67 min)                       | <b>Bicyclogermacrene</b><br>(29.13 min)          |
| <b><math>\delta</math>-Cadinene</b><br>(29.96 min) | <b>Spathulenol</b><br>(31.50; 31.51 min)           | <b>Caryophyllene oxide</b><br>(31.64 min)                | <b>1-<i>epi</i>-Cubenol</b><br>(32.98 min)       |

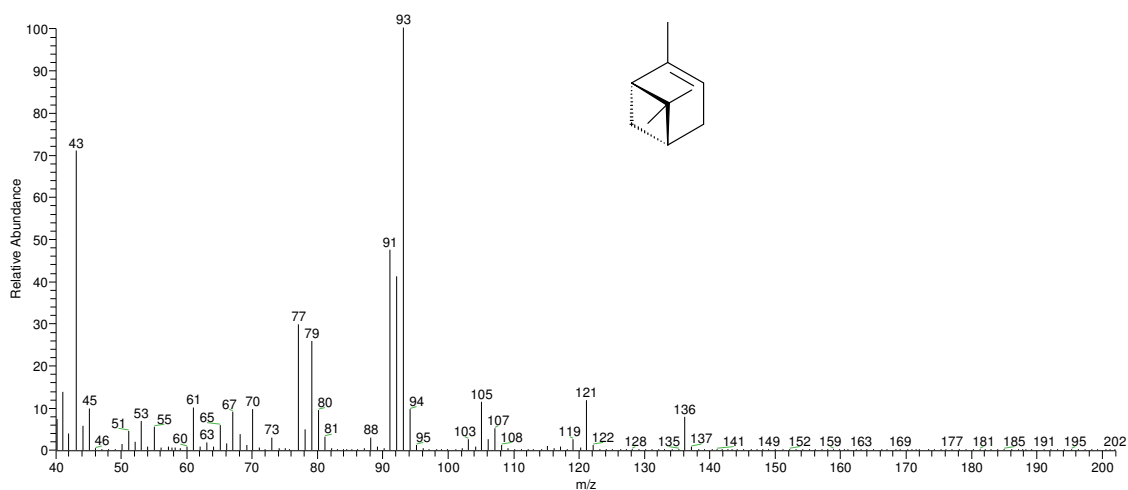

**Figure S2.** Mass spectrum of  $\alpha$ -pinene ( $t_R$  9.27 min).

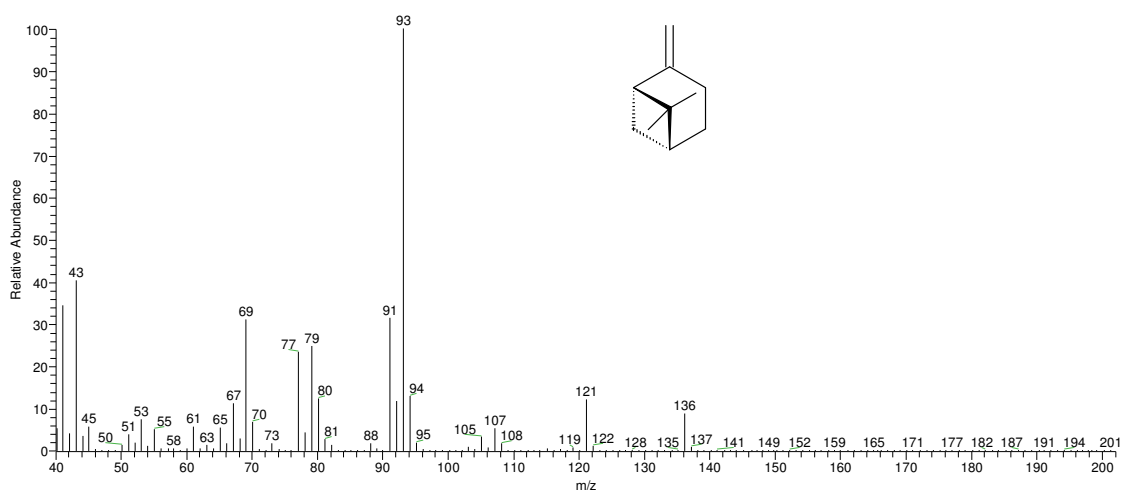

**Figure S3.** Mass spectrum of  $\beta$ -pinene ( $t_R$  10.89 min).

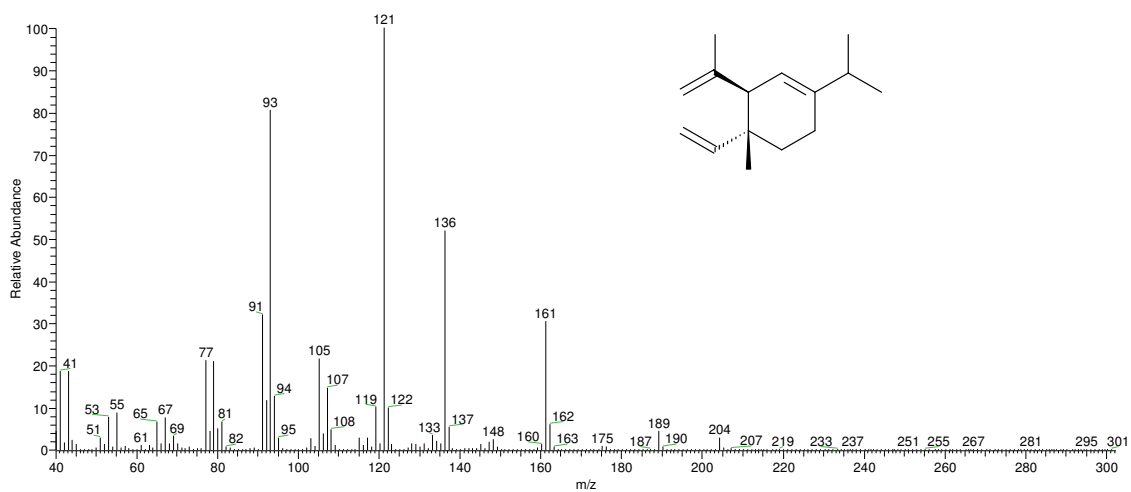

**Figure S4.** Mass spectrum of  $\delta$ -elemene ( $t_R$  24.15 min).

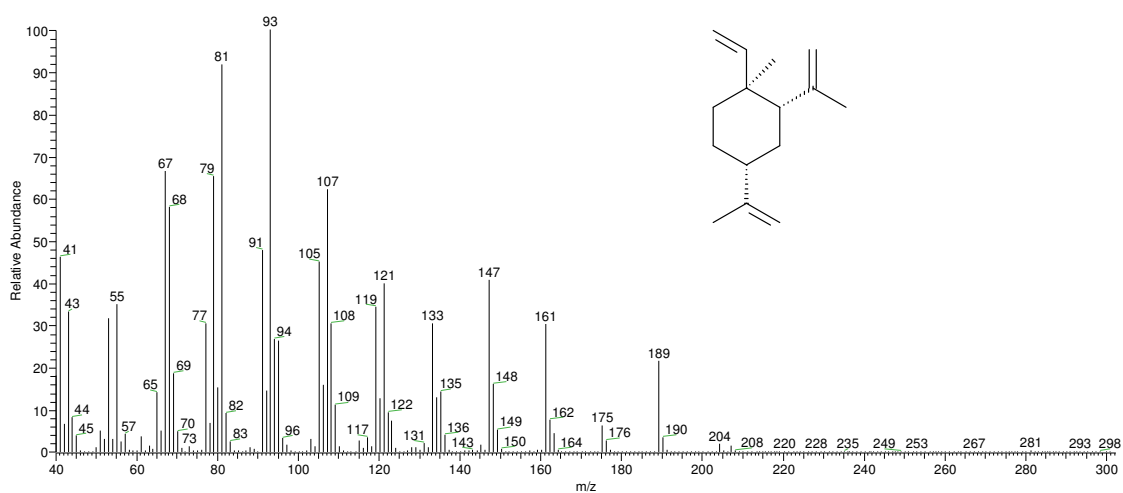

**Figure S5.** Mass spectrum of  $\beta$ -elemene ( $t_R$  25.92 min).

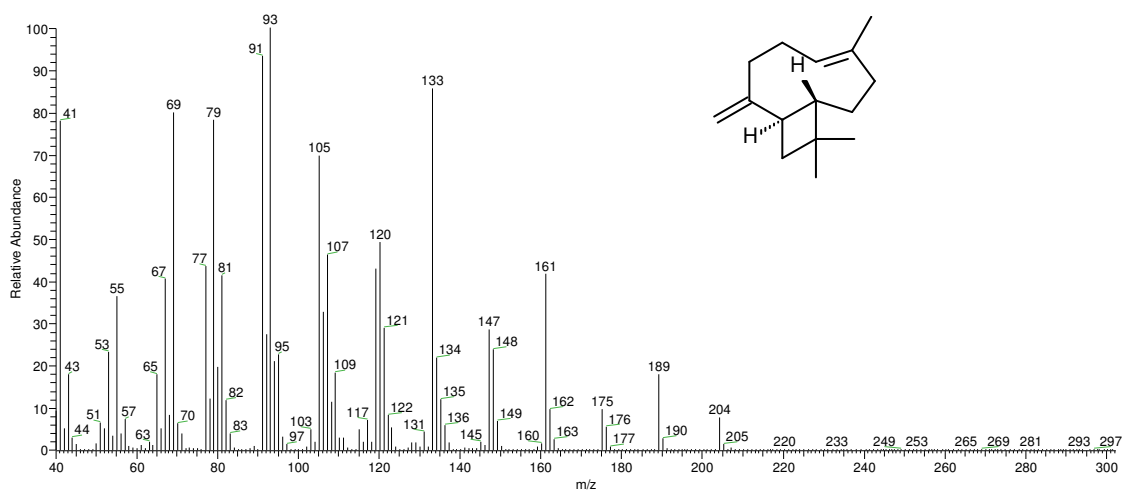

**Figure S6.** Mass spectrum of (*E*)-caryophyllene ( $t_R$  26.75 min).

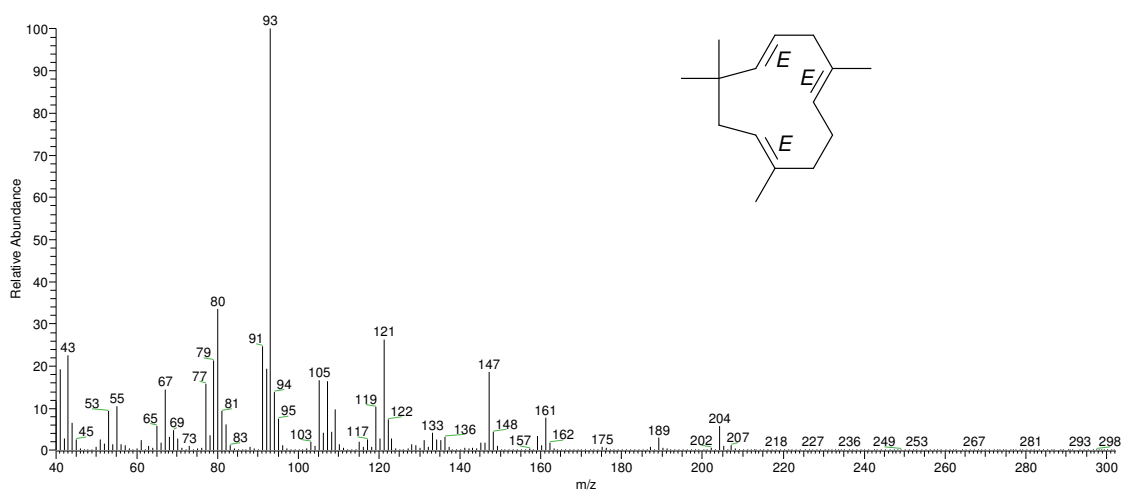

**Figure S7.** Mass spectrum of α-humulene ( $t_R$  27.81 min).

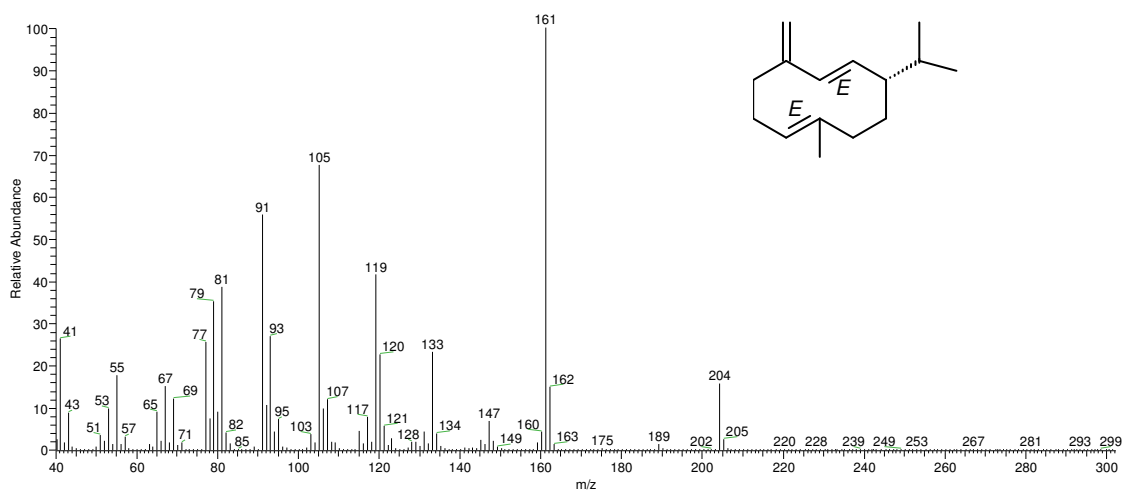

**Figure S8.** Mass spectrum of germacrene D ( $t_R$  28.67 min).

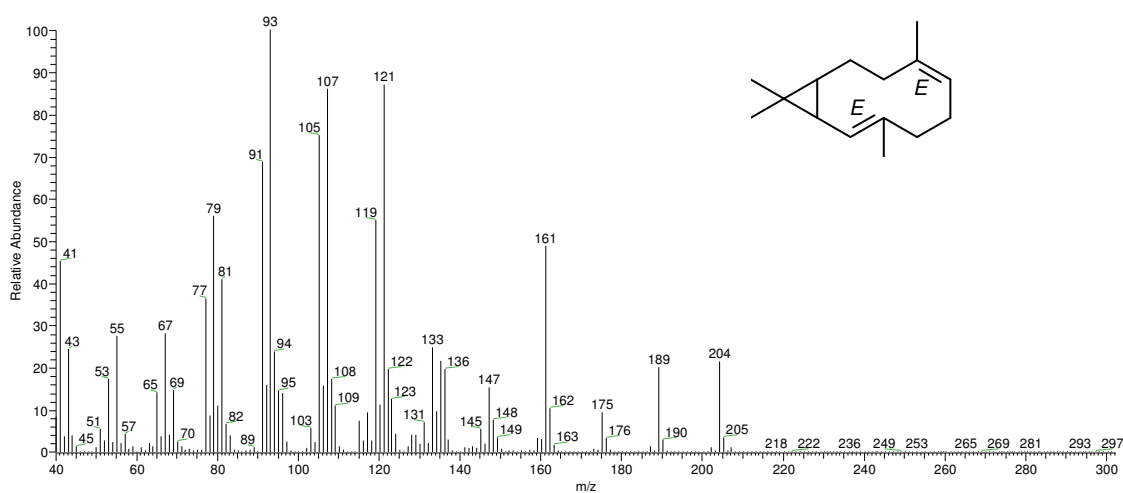

**Figure S9.** Mass spectrum of bicyclogermacrene ( $t_R$  29.13 min).

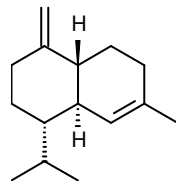

**Figure S10.** Mass spectrum of  $\delta$ -cadinene ( $t_R$  29.96 min).

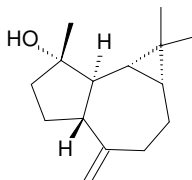

**Figure S11.** Mass spectrum of spathulenol ( $t_R$  31.51 min).

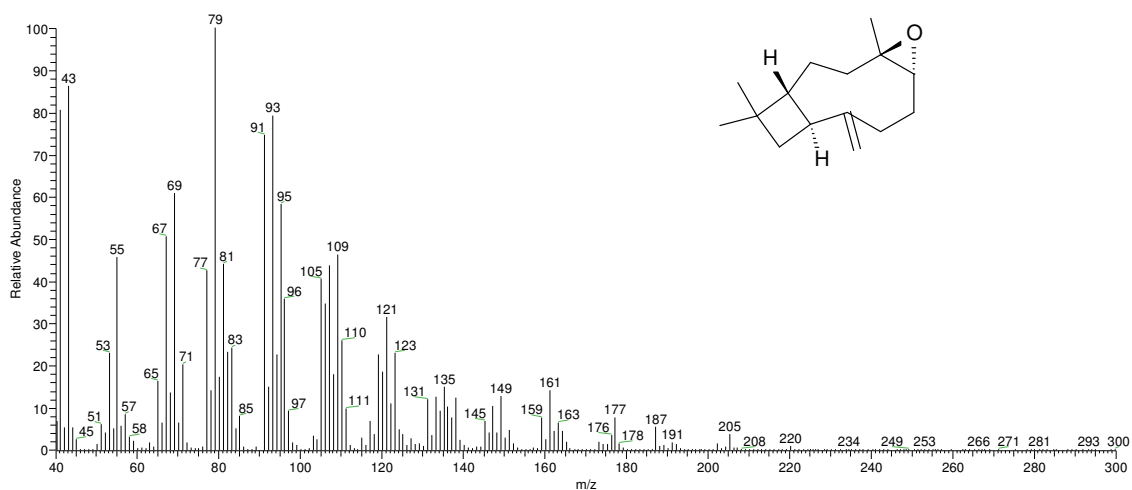

**Figure S12.** Mass spectrum of caryophyllene oxide ( $t_R$  31.64 min).

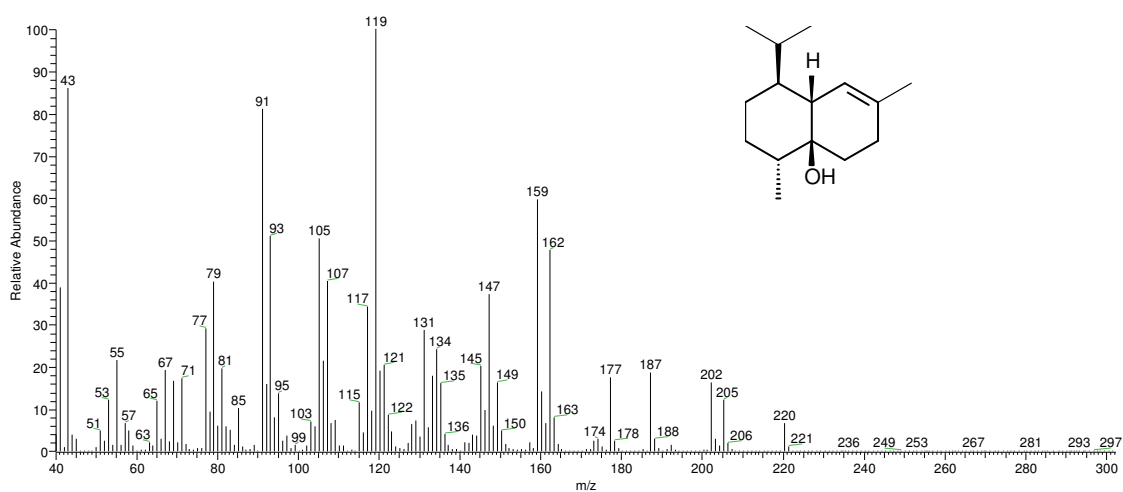

**Figure S13.** Mass spectrum of 1-*epi*-cubenol ( $t_R$  32.98 min).



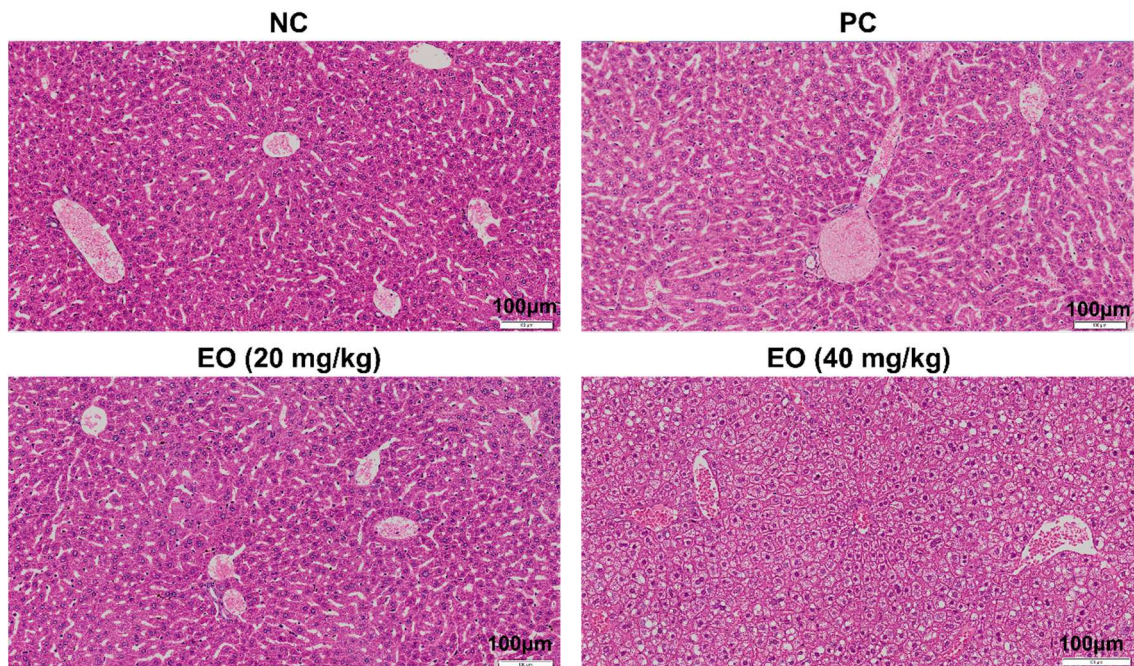

**Figure S14.** Representative photomicrographs of the livers of the C.B-17 SCID mice with HepG2 cell xenografts treated with *G. olivacea* leaf EO. Negative control (**NC**) was treated with vehicle (5% DMSO) used for diluting EO, and doxorubicin (0.8 mg/kg) was used as positive control (**PC**).

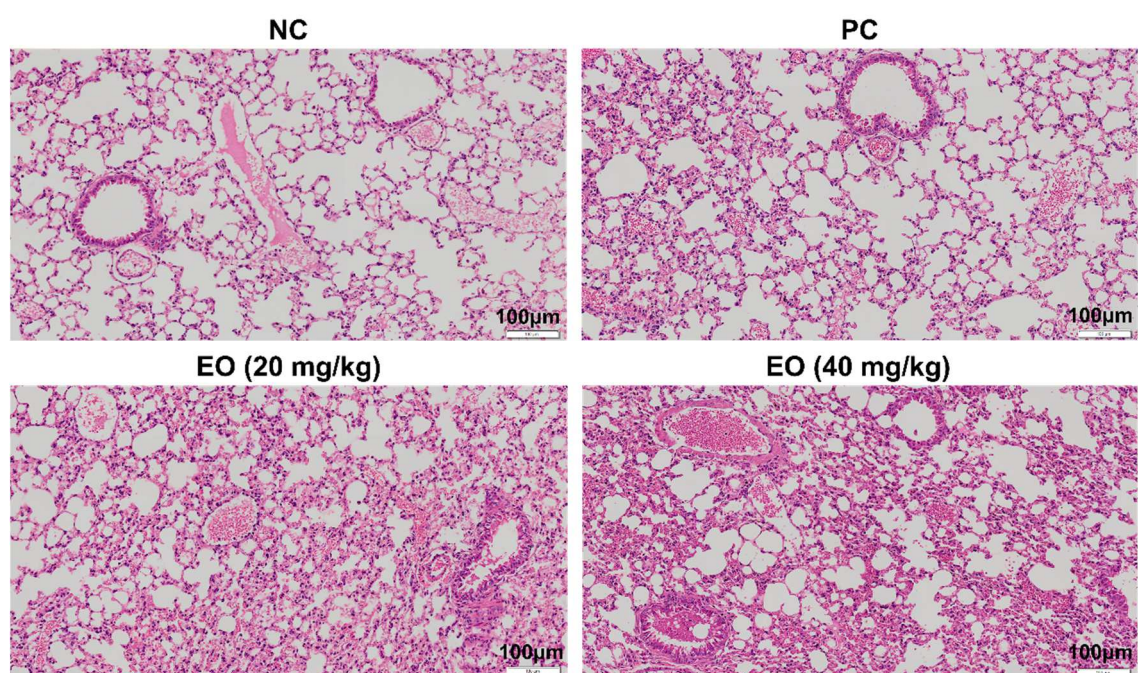

**Figure S15.** Representative photomicrographs of the lungs of the C.B-17 SCID mice with HepgG2 cell xenografts treated with *G. olivacea* leaf EO. Negative control (**NC**) was treated with vehicle (5% DMSO) used for diluting EO, and doxorubicin (0.8 mg/kg) was used as positive control (**PC**).



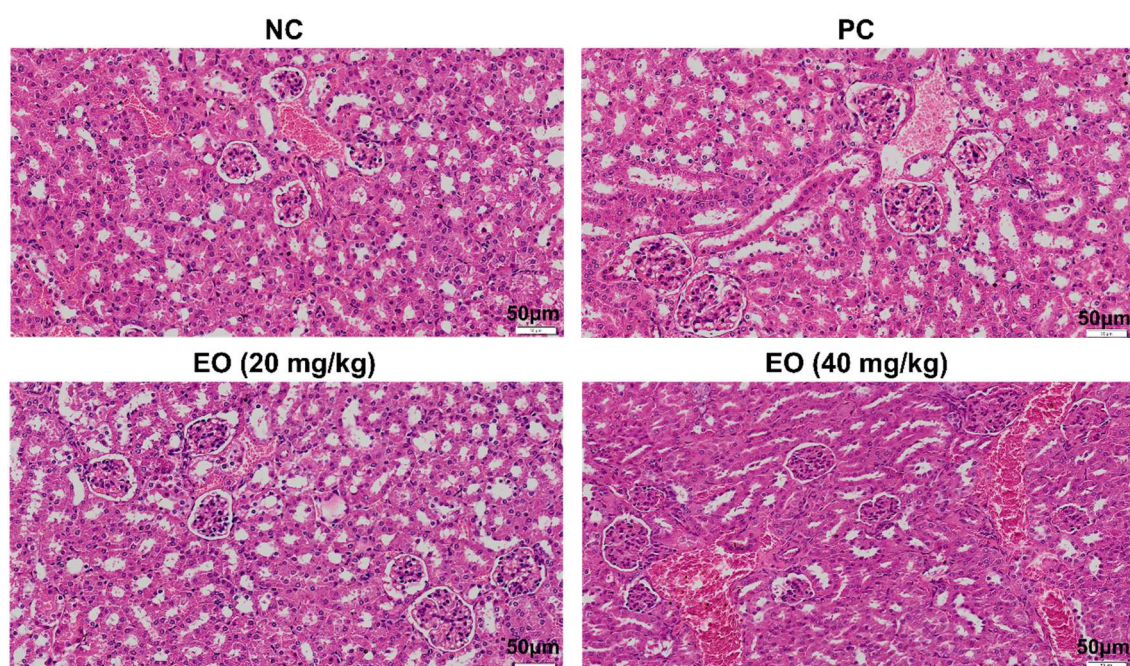

**Figure S16.** Representative photomicrographs of the kidneys of the C.B-17 SCID mice with HepG2 cell xenografts treated with *G. olivacea* leaf EO. Negative control (**NC**) was treated with vehicle (5% DMSO) used for diluting EO, and doxorubicin (0.8 mg/kg) was used as positive control (**PC**).
